# Supplementary material for: Ten-Year Survivorship, Patient-Reported Outcomes, and Satisfaction of a Fixed-Bearing Unicompartmental Knee Arthroplasty
Source: PubMed Central journal article supplement — Arthroplast Today. 2020 Apr 6;6(2):267–73. doi: 10.1016/j.artd.2020.02.016 (PMC7303483; doi:10.1016/j.artd.2020.02.016), 2020-04-06
Supplement: mmc1.pdf [file mmc1.pdf]

# CONFLICT OF INTEREST STATEMENT

## *American Association of Hip and Knee Surgeons*

(Adopted from the American Academy of Orthopaedic Surgeons disclosure statement)

The following form **must be filled out completely and submitted by each author (example, 6 authors, 6 forms).**  
**All items require a response. If there is no relevant disclosure for a given item, enter "None."**

---

Manuscript Title

1. Royalties from a company or supplier (The following conflicts were disclosed) **None**
2. Speakers bureau/paid presentations for a company or supplier (The following conflicts were disclosed) **None**
- 3A. Paid employee for a company or supplier (The following conflicts were disclosed) **Ortho Development Corp.**
- 3B. Paid consultant for a company or supplier (The following conflicts were disclosed) **OrthoGrid Systems, Inc.**
- 3C. Unpaid consultants for a company or supplier (The following conflicts were disclosed) **None**
4. Stock or stock options in a company or supplier (The following conflicts were disclosed) **OrthoGrid Systems, Inc.**
5. Research support from a company or supplier as a Principal Investigator (The following conflicts were disclosed)  
**None**
6. Other financial or material support from a company or supplier (The following conflicts were disclosed) **None**
7. Royalties, financial or material support from publishers (The following conflicts were disclosed) **None**
8. Medical/Orthopaedic publications editorial/governing board (The following conflicts were disclosed) **None**
9. Board member/committee appointments for a society (The following conflicts were disclosed) **None**

**Each author must sign AND print or type his/her name, date and submit a separate form**

In addition, one BLINDED Conflict of Interest form (no author names used) should be submitted per manuscript with all author disclosures.

Mike B. Anderson

Author Name (Print or Type)



Author Signature

09/25/2019  
Date
